# Supplementary material for: Molecular characterization and phylogenetic relatedness of dog-derived Rabies Viruses circulating in Cameroon between 2010 and 2016
Source: PubMed Central journal article supplement (PMC5679643; doi:10.1371/journal.pntd.0006041), 2017-10-30
Supplement: pntd.0006041.s001.pdf [file pntd.0006041.s001.pdf]

**Table S1. List of reference Rabies Viruses whose nucleocapsid coding gene sequences were used in the analyses.**

| <b>Country</b> | <b>Virus Name</b> | <b>Host<br/>(Scientific name)<sup>a</sup></b> | <b>Year</b> | <b>Phylogenetic clade<br/>(subclade)<sup>b</sup></b> | <b>Accession number</b> | <b>Reference</b> |
|----------------|-------------------|-----------------------------------------------|-------------|------------------------------------------------------|-------------------------|------------------|
| Algeria        | 15006FRA          | Dog<br>( <i>Canis familiaris</i> )            | 2015        | Cosmopolitan (AF-1a)                                 | KX148197                | [1]              |
| Algeria        | 96018ALG          | Human<br>( <i>Homo sapiens</i> )              | 1996        | Cosmopolitan (AF-1a)                                 | EU853567                | [2]              |
| Algeria        | 96019ALG          | Human<br>( <i>Homo sapiens</i> )              | 1996        | Cosmopolitan (AF-1a)                                 | EU853568                | [2]              |
| Benin          | 8697BEN           | Cat<br>( <i>Felis catus</i> )                 | 1986        | Africa-2                                             | U22485                  | [3]              |
| Burkina Faso   | 139BF             | Dog<br>( <i>Canis familiaris</i> )            | 2007        | Africa-2                                             | EU478515                | [2]              |
| Burkina Faso   | 36BF              | Dog<br>( <i>Canis familiaris</i> )            | 2007        | Africa-2                                             | EU478502                | [2]              |

|              |          |                                    |      |                      |          |     |
|--------------|----------|------------------------------------|------|----------------------|----------|-----|
| Burkina Faso | 28BF     | Dog<br>( <i>Canis familiaris</i> ) | 2007 | Africa-2             | EU478492 | [2] |
| Burkina Faso | 49BF     | Dog<br>( <i>Canis familiaris</i> ) | 2007 | Africa-2             | EU478518 | [2] |
| Burkina Faso | 9547HAV  | Dog<br>( <i>Canis familiaris</i> ) | 1995 | Africa-2             | EU853645 | [2] |
| Cameroon     | 9236CAM  | Dog<br>( <i>Canis familiaris</i> ) | 1992 | Cosmopolitan (AF-1a) | KT119782 | [4] |
| Cameroon     | 11018CAM | Dog<br>( <i>Canis familiaris</i> ) | 2009 | Cosmopolitan (AF-1a) | KT119787 | [4] |
| Cameroon     | 11019CAM | Dog<br>( <i>Canis familiaris</i> ) | 2010 | Cosmopolitan (AF-1a) | KT119788 | [4] |
| Cameroon     | 11020CAM | Dog<br>( <i>Canis familiaris</i> ) | 2009 | Cosmopolitan (AF-1a) | KT119789 | [4] |
| Cameroon     | 11027CAM | Dog<br>( <i>Canis familiaris</i> ) | 2010 | Cosmopolitan (AF-1a) | KT119793 | [4] |
| Cameroon     | 11023CAM | Dog<br>( <i>Canis familiaris</i> ) | 2011 | Cosmopolitan (AF-1a) | KT119791 | [4] |
| Cameroon     | 11025CAM | Dog<br>( <i>Canis familiaris</i> ) | 2009 | Cosmopolitan (AF-1a) | KT119792 | [4] |

|          |          |                                    |      |                      |          |     |
|----------|----------|------------------------------------|------|----------------------|----------|-----|
| Cameroon | 11028CAM | Dog<br>( <i>Canis familiaris</i> ) | 2011 | Cosmopolitan (AF-1a) | KT119794 | [4] |
| Cameroon | 11029CAM | Dog<br>( <i>Canis familiaris</i> ) | 2011 | Cosmopolitan (AF-1a) | KT119795 | [4] |
| Cameroon | 88003CAM | Dog<br>( <i>Canis familiaris</i> ) | 1987 | Africa-2             | KX148243 | [1] |
| Cameroon | 95002CAM | Dog<br>( <i>Canis familiaris</i> ) | 1994 | Africa-2             | KX148242 | [1] |
| Cameroon | 9502CAM  | Dog<br>( <i>Canis familiaris</i> ) | 1994 | Africa-2             | KT119784 | [4] |
| Cameroon | 8802CAM  | Dog<br>( <i>Canis familiaris</i> ) | 1987 | Africa-2             | KT119774 | [4] |
| Cameroon | 8801CAM  | Dog<br>( <i>Canis familiaris</i> ) | 1987 | Africa-2             | U22634   | [3] |
| Cameroon | 8804CAM  | Dog<br>( <i>Canis familiaris</i> ) | 1988 | Africa-2             | U22635   | [2] |
| Cameroon | 8805CAM  | Dog<br>( <i>Canis familiaris</i> ) | 1988 | Africa-2             | U22636   | [2] |

|                          |          |                                    |      |                      |          |     |
|--------------------------|----------|------------------------------------|------|----------------------|----------|-----|
| Cameroon                 | 86100CAM | Shrew                              | 1974 | Mokola Lyssavirus    | EU293117 | [5] |
| Central African Republic | 08275RCA | Dog<br>( <i>Canis familiaris</i> ) | 2008 | Cosmopolitan (AF-1b) | KT119710 | [4] |
| Central African Republic | 09041RCA | Dog<br>( <i>Canis familiaris</i> ) | 2009 | Cosmopolitan (AF-1b) | KT119710 | [4] |
| Central African Republic | 09041RCA | Dog<br>( <i>Canis familiaris</i> ) | 2009 | Cosmopolitan (AF-1b) | KT119736 | [4] |
| Central African Republic | 07134RCA | Dog<br>( <i>Canis familiaris</i> ) | 2003 | Cosmopolitan (AF-1b) | KT119640 | [4] |
| Central African Republic | 07150RCA | Dog<br>( <i>Canis familiaris</i> ) | 2004 | Cosmopolitan (AF-1b) | KT119655 | [4] |
| Central African Republic | 07157RCA | Dog<br>( <i>Canis familiaris</i> ) | 2006 | Cosmopolitan (AF-1b) | KT119660 | [4] |
| Central African Republic | 07160RCA | Dog<br>( <i>Canis familiaris</i> ) | 2007 | Cosmopolitan (AF-1b) | KT119665 | [4] |
| Central African Republic | 7180RCA  | Dog<br>( <i>Canis familiaris</i> ) | 2007 | Cosmopolitan (AF-1b) | KT119683 | [4] |

|                          |                                     |                                    |      |                      |          |     |
|--------------------------|-------------------------------------|------------------------------------|------|----------------------|----------|-----|
| Central African Republic | 07128RCA                            | Dog<br>( <i>Canis familiaris</i> ) | 2003 | Cosmopolitan (AF-1b) | EU853586 | [2] |
| Central African Republic | 7189RCA                             | Dog<br>( <i>Canis familiaris</i> ) | 2007 | Cosmopolitan (AF-1b) | EU853589 | [2] |
| Central African Republic | 07072RCA                            | Dog<br>( <i>Canis familiaris</i> ) | 2000 | Cosmopolitan (AF-1b) | EU853590 | [2] |
| Central African Republic | CAR_11_001                          | Human<br>( <i>Homo sapiens</i> )   | 2011 | Africa-2             | KF977826 | [6] |
| Central African Republic | othercity_0715<br>1RCA_2004_7<br>08 | Dog<br>( <i>Canis familiaris</i> ) | 2004 | Africa-2             | KT119755 | [4] |
| Central African Republic | 07149RCA                            | Dog<br>( <i>Canis familiaris</i> ) | 2004 | Africa-2             | EU853651 | [2] |
| Chad                     | 90021TCH                            | Dog<br>( <i>Canis familiaris</i> ) | 1990 | Africa-2             | KX148240 | [1] |
| Chad                     | 96009TCH                            | Dog<br>( <i>Canis familiaris</i> ) | 1996 | Africa-2             | KX148241 | [1] |
| Chad                     | 9218TCH                             | Dog<br>( <i>Canis familiaris</i> ) | 1992 | Africa-2             | U22644   | [3] |

|       |             |                                    |      |                     |          |                                            |
|-------|-------------|------------------------------------|------|---------------------|----------|--------------------------------------------|
| Chad  | 369         | Dog<br>( <i>Canis familiaris</i> ) | 2013 | Africa-2            | KU564995 | Lepelletier <i>et al.</i><br>(unpublished) |
| Chad  | 359         | Dog<br>( <i>Canis familiaris</i> ) | 2012 | Africa-2            | KU564990 | Lepelletier <i>et al.</i><br>(unpublished) |
| Chad  | 364         | Dog<br>( <i>Canis familiaris</i> ) | 2012 | Africa-2            | KU564992 | Lepelletier <i>et al.</i><br>(unpublished) |
| Chad  | 367         | Dog<br>( <i>Canis familiaris</i> ) | 2013 | Africa-2            | KU564993 | Lepelletier <i>et al.</i><br>(unpublished) |
| Chad  | Chad2006_45 | Dog<br>( <i>Canis familiaris</i> ) | 2006 | Africa-2            | EU718783 | [2]                                        |
| Chad  | Chad_36_193 | Dog<br>( <i>Canis familiaris</i> ) | 2005 | Africa-2            | EU718740 | [2]                                        |
| Chad  | Chad_31_188 | Dog<br>( <i>Canis familiaris</i> ) | 2005 | Africa-2            | EU718743 | [7]                                        |
| Chad  | Chad_42_199 | Dog<br>( <i>Canis familiaris</i> ) | 2006 | Africa-2            | EU718763 | [2]                                        |
| Egypt | 86092EGY    | Human<br>( <i>Homo sapiens</i> )   | 1979 | Cosmopolitan (AF-4) | KX148101 | [1]                                        |

|                   |          |                                             |      |                      |          |     |
|-------------------|----------|---------------------------------------------|------|----------------------|----------|-----|
| Equatorial Guinea | eg1      | Human<br>( <i>Homo sapiens</i> )            | 2008 | Cosmopolitan (AF-1a) | FJ440104 | [8] |
| Ethiopia          | 9531ETH  | Cow                                         | 1987 | Cosmopolitan (AF-1a) | EU853580 | [2] |
| Ethiopia          | 8808ETH  | Dog ( <i>Canis familiaris</i> )             | 1988 | Cosmopolitan (AF-1a) | EU853581 | [2] |
| Ethiopia          | RV2985   | Ethiopian wolf<br>( <i>Canis simensis</i> ) | 2014 | Cosmopolitan (AF-1a) | KP723638 | [9] |
| Gabon             | 8698GAB  | Dog<br>( <i>Canis familiaris</i> )          | 1986 | Cosmopolitan (AF-1a) | KT119772 | [4] |
| Gabon             | 95049GAB | Dog<br>( <i>Canis familiaris</i> )          | 1995 | Cosmopolitan (AF-1a) | KX148202 | [1] |
| Guinea            | 90024GUI | Dog<br>( <i>Canis familiaris</i> )          | 1990 | Africa-2             | KX148244 | [1] |
| Guinea            | 9361GUI  | Dog<br>( <i>Canis familiaris</i> )          | 1993 | Africa-2             | EU853594 | [2] |
| Israel            | RV2324   | Dog<br>( <i>Canis familiaris</i> )          | 1950 | Cosmopolitan (AF-4)  | KF154998 | [9] |
| Ivory Coast       | 07059IC  | Dog<br>( <i>Canis familiaris</i> )          | 2007 | Africa-2             | EU853615 | [2] |
| Ivory Coast       | 9237IC   | Dog<br>( <i>Canis familiaris</i> )          | 1992 | Africa-2             | EU853618 | [2] |

|             |          |                                    |      |                       |          |     |
|-------------|----------|------------------------------------|------|-----------------------|----------|-----|
| Ivory Coast | 9238IC   | Dog<br>( <i>Canis familiaris</i> ) | 1992 | Africa-2              | EU853619 | [2] |
| Ivory Coast | 8913IC   | Dog<br>( <i>Canis familiaris</i> ) | 1989 | Africa-2              | EU853621 | [2] |
| Kenya       | 14015ITA | Human<br>( <i>Homo sapiens</i> )   | 2014 | Cosmopolitan (AF-1b)  | KX148207 | [1] |
| Mali        | 07232MAL | Dog<br>( <i>Canis familiaris</i> ) | 2006 | Africa-2              | EU853605 | [2] |
| Mali        | 07235MAL | Dog<br>( <i>Canis familiaris</i> ) | 2006 | Africa-2              | EU853598 | [2] |
| Mali        | 07217MAL | Dog<br>( <i>Canis familiaris</i> ) | 2007 | Africa-2              | EU853600 | [2] |
| Madagascar  | 04033MAD | Dog<br>( <i>Canis familiaris</i> ) | 2004 | Cosmopolitan ( AF-1c) | KX148209 | [1] |
| Madagascar  | 86046MAD | Dog<br>( <i>Canis familiaris</i> ) | 1986 | Cosmopolitan ( AF-1c) | KX148211 | [1] |
| Madagascar  | 98002MAD | Human<br>( <i>Homo sapiens</i> )   | 1998 | Cosmopolitan ( AF-1c) | KX148210 | [1] |

|            |            |                                    |      |                       |          |     |
|------------|------------|------------------------------------|------|-----------------------|----------|-----|
| Mauritania | 9311MAU    | Dog<br>( <i>Canis familiaris</i> ) | 1993 | Africa-2              | EU853606 | [2] |
| Mauritania | 9133MAU    | Ass                                | 1991 | Africa-2              | EU853613 | [2] |
| Mauritania | 1923MAU/05 | Dog<br>( <i>Canis familiaris</i> ) | 2005 | Africa-2              | EU514577 | [2] |
| Mauritania | 2019MAU/06 | Dog<br>( <i>Canis familiaris</i> ) | 2006 | Africa-2              | EU514580 | [2] |
| Mauritania | 2049MAU/07 | Goat                               | 2007 | Africa-2              | EU514581 | [2] |
| Mozambique | 86031MOZ   | Dog<br>( <i>Canis familiaris</i> ) | 1986 | Cosmopolitan ( AF-1b) | KX148203 | [1] |
| Morocco    | 9016MAR    | Dog<br>( <i>Canis familiaris</i> ) | 1990 | Cosmopolitan (AF-1a)  | EU853569 | [2] |
| Morocco    | 9109MAR    | Human<br>( <i>Homo sapiens</i> )   | 1991 | Cosmopolitan (AF-1a)  | EU853570 | [2] |
| Morocco    | 9108MAR    | Human<br>( <i>Homo sapiens</i> )   | 1991 | Cosmopolitan (AF-1a)  | EU853571 | [2] |
| Morocco    | 8678MAR    | Human<br>( <i>Homo sapiens</i> )   | 1986 | Cosmopolitan (AF-1a)  | EU853572 | [2] |

|         |           |                                    |      |                       |          |     |
|---------|-----------|------------------------------------|------|-----------------------|----------|-----|
| Morocco | 04031MAR  | Dog<br>( <i>Canis familiaris</i> ) | 2004 | Cosmopolitan (AF-1a)  | KX148195 | [1] |
| Morocco | 08342MAR  | Dog<br>( <i>Canis familiaris</i> ) | 2008 | Cosmopolitan (AF-1a)  | KX148193 | [1] |
| Morocco | RV2627    | Cow<br>( <i>Bos taurus</i> )       | 2009 | Cosmopolitan (AF-1b)  | KF155001 | [9] |
| Namibia | 92030NAM  | Dog<br>( <i>Canis familiaris</i> ) | 1992 | Cosmopolitan ( AF-1b) | KX148204 | [1] |
| Niger   | 9013NIG   | Dog<br>( <i>Canis familiaris</i> ) | 1990 | Africa-2              | EU853649 | [2] |
| Niger   | 246NIG/07 | Dog<br>( <i>Canis familiaris</i> ) | 2007 | Africa-2              | EU514571 | [2] |
| Niger   | 247NIG/07 | Dog<br>( <i>Canis familiaris</i> ) | 2007 | Africa-2              | EU514572 | [2] |
| Niger   | 252NIG/07 | Dog<br>( <i>Canis familiaris</i> ) | 2007 | Africa-2              | EU514574 | [2] |
| Niger   | 8718NIG   | Dog<br>( <i>Canis familiaris</i> ) | 1975 | Africa-2              | U22863   | [3] |
| Nigeria | 86003BRE  | Dog<br>( <i>Canis familiaris</i> ) | 1986 | Cosmopolitan (AF-1a)  | KX148201 | [1] |

|         |           |                                    |      |          |          |                                             |
|---------|-----------|------------------------------------|------|----------|----------|---------------------------------------------|
| Nigeria | RD128     | Dog<br>( <i>Canis familiaris</i> ) | 2006 | Africa-2 | EU038108 | [2]                                         |
| Nigeria | RD141HN   | Dog<br>( <i>Canis familiaris</i> ) | 2006 | Africa-2 | EU038109 | [2]                                         |
| Nigeria | D7305HN   | Dog<br>( <i>Canis familiaris</i> ) | 2005 | Africa-2 | EU038089 | Dzikwi,A.A <i>et al.</i> ,<br>(unpublished) |
| Nigeria | RD41HN    | Dog<br>( <i>Canis familiaris</i> ) | 2006 | Africa-2 | EU038091 | [2]                                         |
| Nigeria | RD103     | Dog<br>( <i>Canis familiaris</i> ) | 2006 | Africa-2 | EU038100 | [2]                                         |
| Nigeria | 9N/2005   | Dog<br>( <i>Canis familiaris</i> ) | 2005 | Africa-2 | KF022169 | David D.<br>(unpublished)                   |
| Nigeria | 155N/2005 | Dog<br>( <i>Canis familiaris</i> ) | 2005 | Africa-2 | KF022185 | David D.<br>(unpublished)                   |
| Nigeria | 177N/2005 | Dog<br>( <i>Canis familiaris</i> ) | 2005 | Africa-2 | KF022189 | David D.<br>(unpublished)                   |
| Nigeria | DRV-NG11  | Dog<br>( <i>Canis familiaris</i> ) | 2011 | Africa-2 | KC196743 | [10]                                        |

|              |                     |                                                    |      |                      |          |                                                    |
|--------------|---------------------|----------------------------------------------------|------|----------------------|----------|----------------------------------------------------|
| Nigeria      | 252NigeriaMinna2012 | Dog<br>( <i>Canis familiaris</i> )                 | 2012 | Africa-2             | KR080521 | Velasco-Villa, A. <i>et al.</i> ,<br>(unpublished) |
| Rwanda       | 94289RWA            | Dog<br>( <i>Canis familiaris</i> )                 | 1994 | Cosmopolitan (AF1-b) | KX148205 | [1]                                                |
| Senegal      | 07207SEN            | Human<br>( <i>Homo sapiens</i> )                   | 1997 | Africa-2             | EU853626 | [2]                                                |
| Senegal      | 07020SEN            | Human<br>( <i>Homo sapiens</i> )                   | 2002 | Africa-2             | EU853627 | [2]                                                |
| Senegal      | 07021SEN            | Human<br>( <i>Homo sapiens</i> )                   | 2004 | Africa-2             | EU853639 | [2]                                                |
| Senegal      | 07019SEN            | Human<br>( <i>Homo sapiens</i> )                   | 1996 | Africa-2             | EU853640 | [2]                                                |
| Senegal      | 02025SEN            | Human<br>( <i>Homo sapiens</i> )                   | 2001 | Africa-2             | EU853644 | [2]                                                |
| Senegal      | 07023SEN            | Human<br>( <i>Homo sapiens</i> )                   | 2005 | Africa-2             | EU853592 | [2]                                                |
| Sierra Leone | 07208SL             | cat                                                | 1997 | Africa-2             | EU853595 | [2]                                                |
| South Africa | 15001AFS            | Yellow mongoose<br>( <i>Cynictis penicillata</i> ) | 2013 | Africa-3             | KX148220 | [1]                                                |

|              |          |                     |      |                      |          |                                            |
|--------------|----------|---------------------|------|----------------------|----------|--------------------------------------------|
| South Africa | 956-06   | Mongoose            | 2014 | Africa-3             | JQ692991 | Ngoepe E. <i>et al.</i> ,<br>(unpublished) |
| Tanzania     | RV853    | spotted hyena       | 2000 | Cosmopolitan (AF-1b) | DQ900566 | [11]                                       |
| Tanzania     | A04-4981 | small-spotted genet | 2003 | Cosmopolitan (AF-1b) | DQ900566 | [11]                                       |

<sup>a</sup> The scientific name of host species is provided, if available.

<sup>b</sup> AF-1a, lineage “a” of the subclade Africa-1; AF-1b, lineage “b” of the subclade Africa-1, AF-1c, lineage “c” of the subclade Africa-1.

ND, no data available.

## REFERENCES

1. Troupin C, Dacheux L, Tanguy M, Sabeta C, Blanc H, et al. (2016) Large-Scale Phylogenomic Analysis Reveals the Complex Evolutionary History of Rabies Virus in Multiple Carnivore Hosts. *PLoS Pathog* 12: e1006041.
2. Talbi C, Holmes EC, de Benedictis P, Faye O, Nakoune E, et al. (2009) Evolutionary history and dynamics of dog rabies virus in western and central Africa. *J Gen Virol* 90: 783-791.
3. Kissi B, Tordo N, Bourhy H (1995) Genetic polymorphism in the rabies virus nucleoprotein gene. *Virology* 209: 526-537.
4. Bourhy H, Nakoune E, Hall M, Nouvellet P, Lepelletier A, et al. (2016) Revealing the Micro-scale Signature of Endemic Zoonotic Disease Transmission in an African Urban Setting. *PLoS Pathog* 12: e1005525.
5. Delmas O, Holmes EC, Talbi C, Larrous F, Dacheux L, et al. (2008) Genomic diversity and evolution of the lyssaviruses. *PLoS One* 3: e2057.
6. Tricou V, Berthet N, Nakoune E, Kazanji M (2014) Complete genome sequence of a rabies virus isolated from a human in central african republic. *Genome Announc* 2.
7. Durr S, Naissengar S, Mindekem R, Diguimbye C, Niezgodá M, et al. (2008) Rabies diagnosis for developing countries. *PLoS Negl Trop Dis* 2: e206.

8. Rubin J, David D, Willoughby RE, Jr., Rupprecht CE, Garcia C, et al. (2009) Applying the Milwaukee protocol to treat canine rabies in Equatorial Guinea. *Scand J Infect Dis* 41: 372-375.
9. Marston DA, Wise EL, Ellis RJ, McElhinney LM, Banyard AC, et al. (2015) Complete genomic sequence of rabies virus from an ethiopian wolf. *Genome Announc* 3.
10. Zhou M, Zhou Z, Kia GS, Gnanadurai CW, Leyson CM, et al. (2013) Complete genome sequence of a street rabies virus isolated from a dog in Nigeria. *Genome Announc* 1.
11. Lembo T, Haydon DT, Velasco-Villa A, Rupprecht CE, Packer C, et al. (2007) Molecular epidemiology identifies only a single rabies virus variant circulating in complex carnivore communities of the Serengeti. *Proc Biol Sci* 274: 2123-2130.
